# Supplementary figures and images for: Les amants du pont Saint-Jean : film
Source: Springer Nature journal article supplement (doi:10.1186/1472-6947-10-72), 1947-01-01

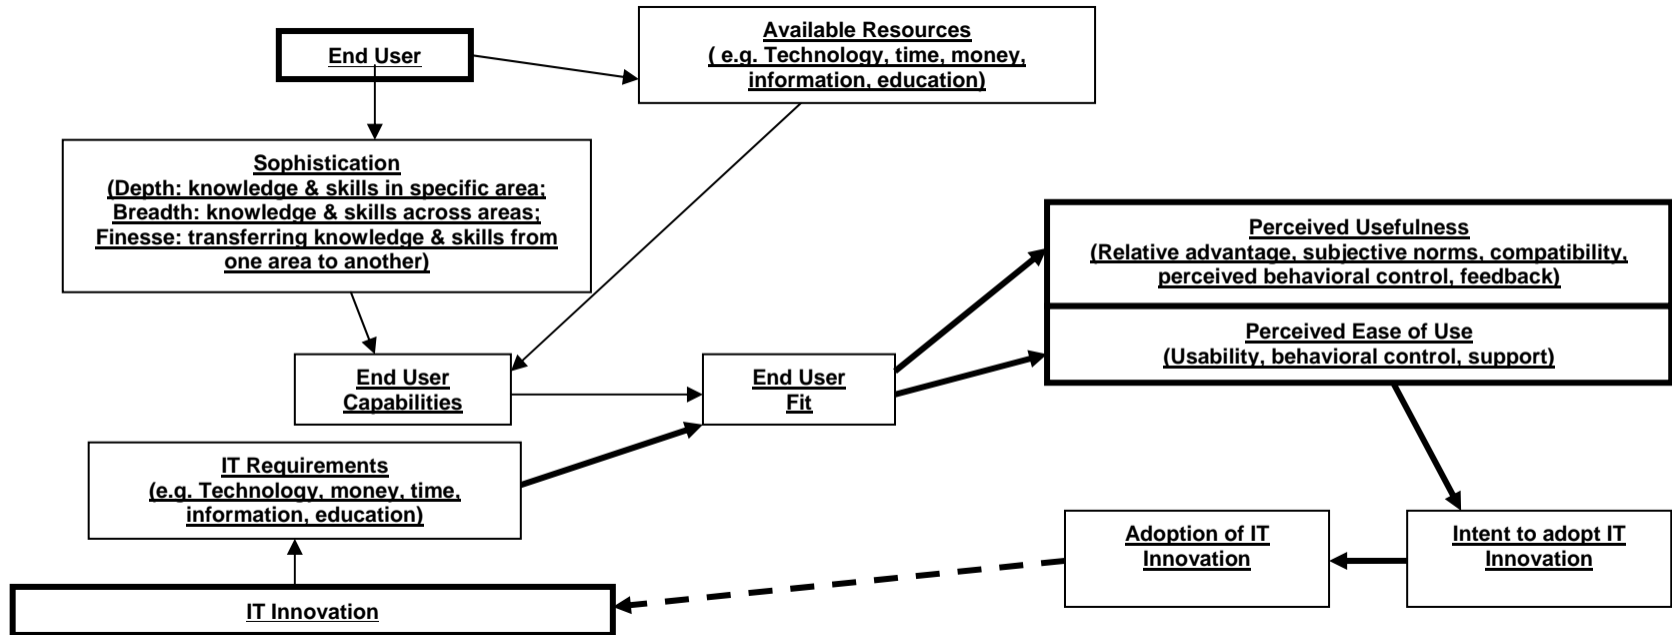

Supplement: 12911_2010_373_MOESM1_ESM.pdf [file 12911_2010_373_MOESM1_ESM.pdf]

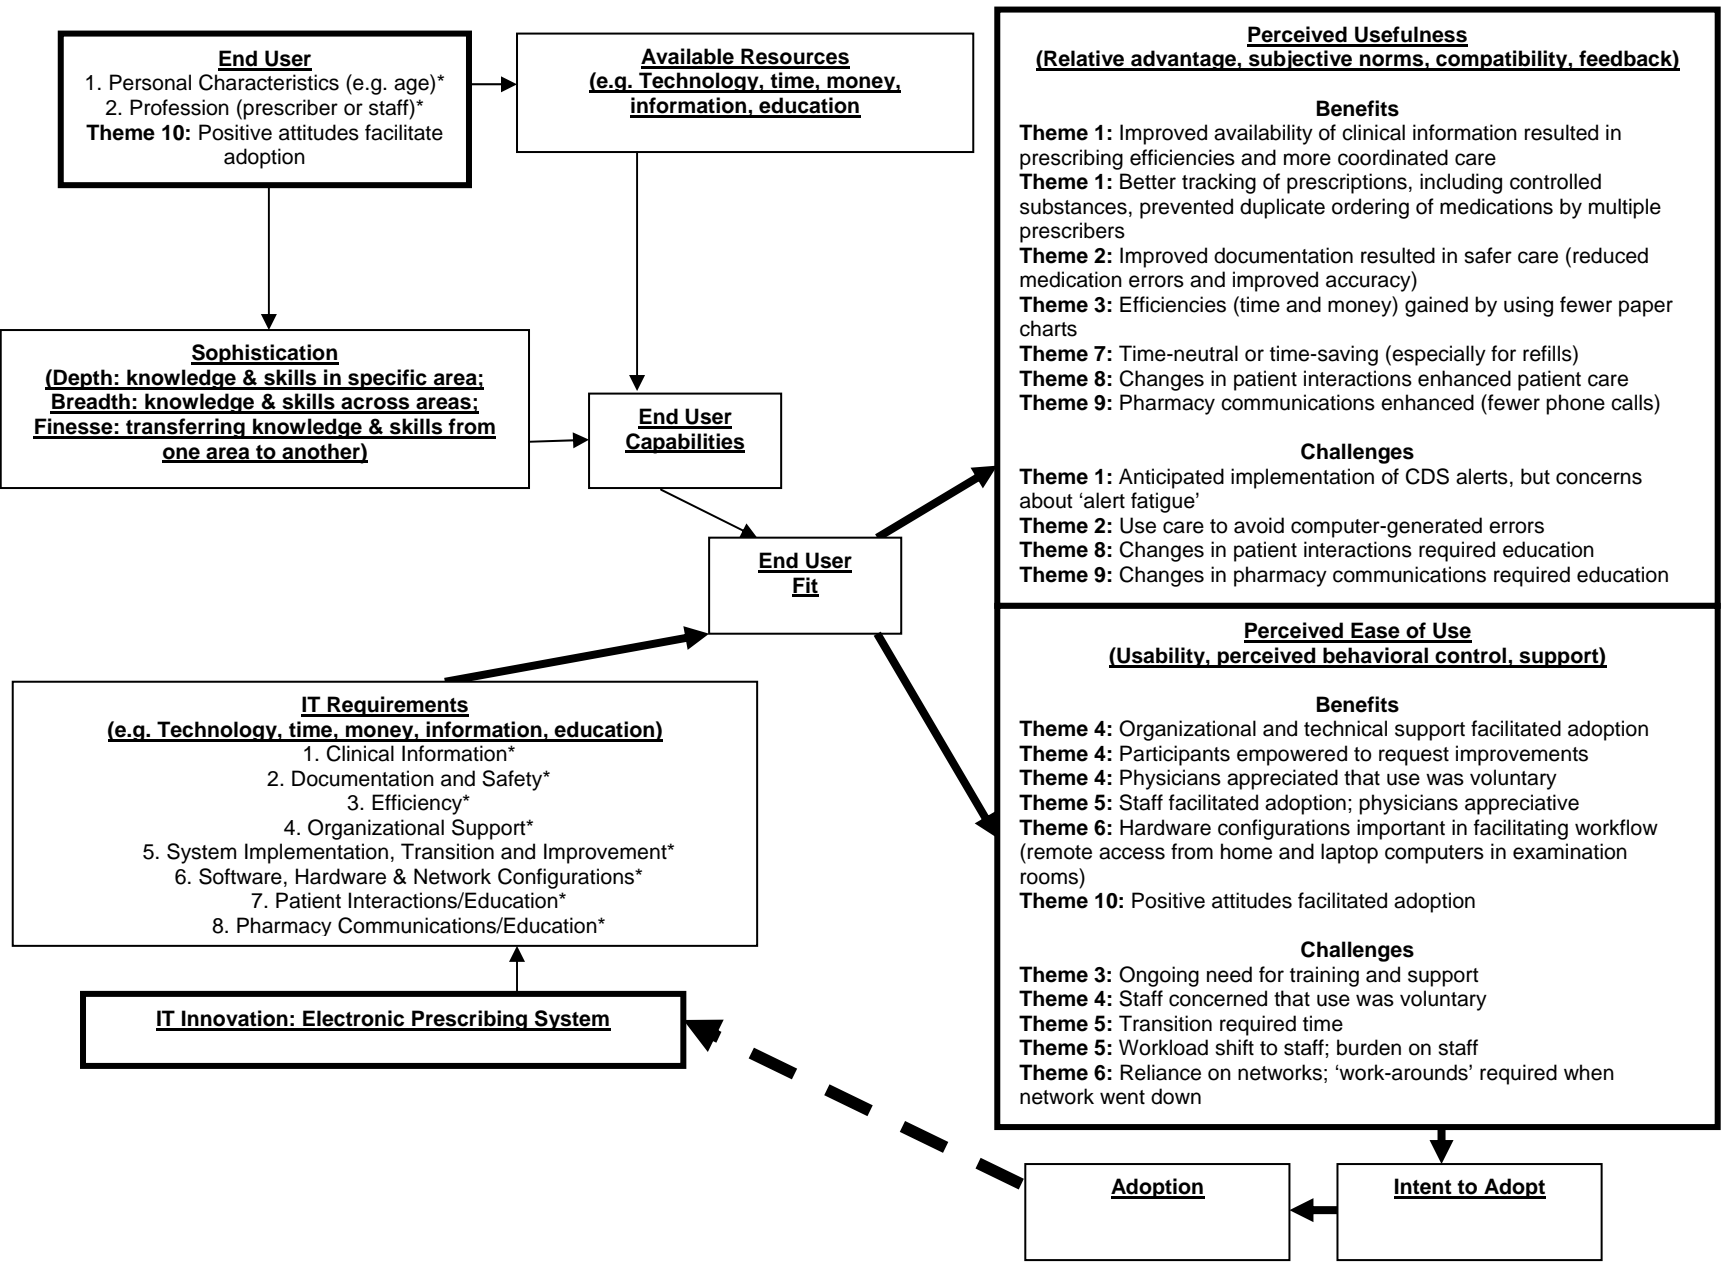

Supplement: 12911_2010_373_MOESM2_ESM.pdf [file 12911_2010_373_MOESM2_ESM.pdf]
